# Supplementary material
Source: PubMed Central journal article supplement (PMC7247054)
Supplement: NIHMS1584372-supplement-Appendix_B.pdf [file NIHMS1584372-supplement-Appendix_B.pdf]

## B VARIANCE AND COVARIANCE OF ESTIMATORS

### B.1 Simplified data-generating setting

Throughout this section, we assume that the underlying data-generating process for the cluster-level outcomes follows a mixed-effects model:

$$Y_{i,j} = \mu + \alpha_i + \theta_j + X_{i,j}\beta + \epsilon_{i,j} \quad (\text{B1})$$

where the  $\alpha_i$  are independently distributed with mean 0 and variance  $\tau^2$ , the  $\epsilon_{i,j}$  are independently distributed with mean 0 and variance  $\sigma_{i,j}^2$  and  $\alpha_i \perp \epsilon_{i',j'}$  for all  $i, i', j, j'$ . Note that this is similar to the risk difference model in Simulation 1 in Section 3, but differs in that we force  $\epsilon_{i,j} \perp \alpha_i$ , so the mean-variance relationship no longer holds.

Thus:

$$\begin{aligned} \text{Var}(Y_{i,j}) &= \tau^2 + \sigma_{i,j}^2. \\ \text{Cov}(Y_{i,j}, Y_{i',j'}) &= \begin{cases} \tau^2, & i = i', j \neq j' \\ 0, & i \neq i' \end{cases}. \end{aligned}$$

We assume, as in the simulations in Section 3 that there are  $J$  periods,  $J - 1$  clusters, with cluster  $i$  on control for periods  $1, \dots, i$  and on intervention for periods  $i + 1, \dots, J$ .

### B.2 Variance of the non-parametric within-period estimator

The non-parametric within-period estimator is given by:

$$\hat{\beta}^{NPWP} = \sum_{j=2}^{J-1} v_j \left( \frac{\sum_{i=1}^{j-1} Y_{i,j}}{j-1} - \frac{\sum_{i=j}^{J-1} Y_{i,j}}{J-j} \right) \equiv \sum_{j=2}^{J-1} v_j A_j, \quad (\text{B2})$$

for weights  $v_j$  that sum to 1. For ease of variance calculations, we here assume, contrary to the estimator used Section 3, that the weights  $v_j$  are fixed and independent of the data (they can still depend on the number of clusters in the intervention and control conditions in period  $j$ , however).

$$\begin{aligned} \text{Var}(A_j) &= \text{Var} \left( \frac{\sum_{i=1}^{j-1} Y_{i,j}}{j-1} - \frac{\sum_{i=j}^{J-1} Y_{i,j}}{J-j} \right) = \sum_{i=1}^{j-1} \frac{\text{Var}(Y_{i,j})}{(j-1)^2} + \sum_{i=j}^{J-1} \frac{\text{Var}(Y_{i,j})}{(J-j)^2} \\ &= \frac{\sum_{i=1}^{j-1} (\sigma_{i,j}^2 + \tau^2)}{(j-1)^2} + \frac{\sum_{i=j}^{J-1} (\sigma_{i,j}^2 + \tau^2)}{(J-j)^2} = \frac{J-1}{(J-j)(j-1)} \tau^2 + \frac{\sum_{i=1}^{j-1} \sigma_{i,j}^2}{(j-1)^2} + \frac{\sum_{i=j}^{J-1} \sigma_{i,j}^2}{(J-j)^2}. \end{aligned}$$

For  $j \neq k$  (WLOG, assume  $k > j$ ):

$$\begin{aligned} \text{Cov}(A_j, A_k) &= \text{Cov} \left( \frac{\sum_{i=1}^{j-1} Y_{i,j}}{j-1} - \frac{\sum_{i=j}^{J-1} Y_{i,j}}{J-j}, \frac{\sum_{i=1}^{k-1} Y_{i,k}}{k-1} - \frac{\sum_{i=k}^{J-1} Y_{i,k}}{J-k} \right) \\ &= \frac{1}{(j-1)(k-1)} \sum_{i=1}^{j-1} \text{Cov}(Y_{i,j}, Y_{i,k}) - \frac{1}{(J-j)(k-1)} \sum_{i=j}^{k-1} \text{Cov}(Y_{i,j}, Y_{i,k}) + \frac{1}{(J-j)(J-k)} \sum_{i=k}^{J-1} \text{Cov}(Y_{i,j}, Y_{i,k}) \\ &= \tau^2 \left( \frac{1}{k-1} - \frac{k-j}{(J-j)(k-1)} + \frac{1}{J-j} \right) = \frac{\tau^2}{(J-j)(k-1)} (J-j - (k-j) + k-1) \\ &= \tau^2 \frac{J-1}{(J-j)(k-1)}. \end{aligned}$$

Thus:

$$\begin{aligned} \text{Var}(\hat{\beta}^{NPWP}) &= \text{Cov} \left( \sum_{j=2}^{J-1} v_j A_j, \sum_{k=2}^{J-1} v_k A_k \right) = \sum_{j=2}^{J-1} v_j^2 \text{Var}(A_j) + 2 \sum_{j=2}^{J-2} \sum_{k=j+1}^{J-1} v_j v_k \text{Cov}(A_j, A_k) \\ &= \sum_{j=2}^{J-1} v_j^2 \left[ \frac{J-1}{(J-j)(j-1)} \tau^2 + \frac{\sum_{i=1}^{j-1} \sigma_{i,j}^2}{(j-1)^2} + \frac{\sum_{i=j}^{J-1} \sigma_{i,j}^2}{(J-j)^2} \right] + 2 \sum_{j=2}^{J-2} \sum_{k=j+1}^{J-1} v_j v_k \tau^2 \frac{J-1}{(J-j)(k-1)}. \end{aligned} \quad (\text{B3})$$

Note that the variance increases as any  $\sigma_{i,j}^2$  or  $\tau^2$  increase, holding all else constant.

### B.3 Variance of the crossover estimator

The crossover estimator is given by:

$$\hat{\beta}^{CO} = \sum_{j=2}^{J-1} w_j \left[ Y_{j-1,j} - Y_{j-1,j-1} - \frac{1}{J-j} \sum_{\ell=j}^{J-1} (Y_{\ell,j} - Y_{\ell,j-1}) \right] \equiv \sum_{j=2}^{J-1} w_j B_j, \quad (\text{B4})$$

for weights  $w_j$  that sum to 1.

Note that for all  $i$ ,  $Y_{i,j} - Y_{i,j'} = \epsilon_{ij} - \epsilon_{ij'} + \beta I(X_{ij} \neq X_{ij'})$ . Hence:

$$\begin{aligned} \text{Var}(B_j) &= \text{Var} \left( \epsilon_{j-1,j} - \epsilon_{j-1,j-1} + \beta - \frac{1}{J-j} \sum_{\ell=j}^{J-1} (\epsilon_{\ell,j} - \epsilon_{\ell,j-1}) \right) = \sigma_{j-1,j}^2 + \sigma_{j-1,j-1}^2 + \frac{1}{(J-j)^2} \sum_{\ell=j}^{J-1} (\sigma_{\ell,j}^2 + \sigma_{\ell,j-1}^2). \\ \text{Cov}(B_j, B_{j+1}) &= \text{Cov} \left( \epsilon_{j-1,j} - \epsilon_{j-1,j-1} + \beta - \frac{1}{J-j} \sum_{\ell=j}^{J-1} (\epsilon_{\ell,j} - \epsilon_{\ell,j-1}), \epsilon_{j,j+1} - \epsilon_{j,j} + \beta - \frac{1}{J-j-1} \sum_{m=j+1}^{J-1} (\epsilon_{m,j+1} - \epsilon_{m,j}) \right) \\ &= \frac{1}{J-j} \left[ \sigma_{j,j}^2 - \sum_{\ell=j+1}^{J-1} \frac{\sigma_{\ell,j}^2}{J-j-1} \right]. \\ \text{Cov}(B_j, B_k) &= \text{Cov} \left( \epsilon_{j-1,j} - \epsilon_{j-1,j-1} + \beta - \frac{1}{J-j} \sum_{\ell=j}^{J-1} (\epsilon_{\ell,j} - \epsilon_{\ell,j-1}), \epsilon_{k-1,k} - \epsilon_{k-1,k-1} + \beta - \frac{1}{J-k} \sum_{m=k}^{J-1} (\epsilon_{m,k} - \epsilon_{m,k-1}) \right) \\ &= 0 \text{ for } k > j + 1. \end{aligned}$$

Thus:

$$\begin{aligned} \text{Var}(\hat{\beta}^{CO}) &= \text{Cov} \left( \sum_{j=2}^{J-1} w_j B_j, \sum_{k=2}^{J-1} w_k B_k \right) = \sum_{j=2}^{J-1} w_j^2 \text{Var}(B_j) + 2 \sum_{j=2}^{J-2} w_j w_{j+1} \text{Cov}(B_j, B_{j+1}) \\ &= \sum_{j=2}^{J-1} w_j^2 \left[ \sigma_{j-1,j}^2 + \sigma_{j-1,j-1}^2 + \frac{1}{(J-j)^2} \sum_{\ell=j}^{J-1} (\sigma_{\ell,j}^2 + \sigma_{\ell,j-1}^2) \right] + 2 \sum_{j=2}^{J-2} w_j w_{j+1} \frac{1}{J-j} \left( \sigma_{j,j}^2 - \sum_{\ell=j+1}^{J-1} \frac{\sigma_{\ell,j}^2}{J-j-1} \right). \quad (\text{B5}) \end{aligned}$$

Note that, unlike the variance of the NPWP estimator, this variance does not depend on  $\tau^2$ .

### B.4 Covariance of the non-parametric within-period estimator and the crossover estimator

We begin by noting that:

$$\begin{aligned} A_j &= \frac{1}{j-1} \sum_{i=1}^{j-1} (\mu + \alpha_i + \theta_j + \beta + \epsilon_{i,j}) - \frac{1}{J-j} \sum_{i=j}^{J-1} (\mu + \alpha_i + \theta_j + \epsilon_{i,j}) \\ &= \mu + \theta_j + \beta + \frac{1}{j-1} \sum_{i=1}^{j-1} (\alpha_i + \epsilon_{i,j}) - (\mu + \theta_j) - \frac{1}{J-j} \sum_{i=j}^{J-1} (\alpha_i + \epsilon_{i,j}) \\ &= \beta + \frac{1}{j-1} \sum_{i=1}^{j-1} (\alpha_i + \epsilon_{i,j}) - \frac{1}{J-j} \sum_{i=j}^{J-1} (\alpha_i + \epsilon_{i,j}). \end{aligned}$$

Hence, dropping the  $\beta$  terms in  $A_j$  and  $B_j$  since they do not contribute any variability:

$$\begin{aligned} \text{Cov}(A_j, B_j) &= \frac{1}{j-1} \sum_{i=1}^{j-1} \text{Cov} \left( \alpha_i + \epsilon_{i,j}, \epsilon_{j-1,j} - \epsilon_{j-1,j-1} - \frac{1}{J-j} \sum_{\ell=j}^{J-1} (\epsilon_{\ell,j} - \epsilon_{\ell,j-1}) \right) \\ &\quad - \frac{1}{J-j} \sum_{i=j}^{J-1} \text{Cov} \left( \alpha_i + \epsilon_{i,j}, \epsilon_{j-1,j} - \epsilon_{j-1,j-1} - \frac{1}{J-j} \sum_{\ell=j}^{J-1} (\epsilon_{\ell,j} - \epsilon_{\ell,j-1}) \right) \\ &= \frac{1}{j-1} \sigma_{j-1,j}^2 + \frac{1}{(J-j)^2} \sum_{i=j}^{J-1} \sigma_{i,j}^2. \end{aligned}$$

$$\begin{aligned} \text{Cov}(A_j, B_k) &= \frac{1}{j-1} \sum_{i=1}^{j-1} \text{Cov} \left( \alpha_i + \epsilon_{i,j}, \epsilon_{k-1,k} - \epsilon_{k-1,k-1} - \frac{1}{J-k} \sum_{\ell=k}^{J-1} (\epsilon_{\ell,k} - \epsilon_{\ell,k-1}) \right) \\ &\quad - \frac{1}{J-j} \sum_{i=j}^{J-1} \text{Cov} \left( \alpha_i + \epsilon_{i,j}, \epsilon_{k-1,k} - \epsilon_{k-1,k-1} - \frac{1}{J-k} \sum_{\ell=k}^{J-1} (\epsilon_{\ell,k} - \epsilon_{\ell,k-1}) \right). \end{aligned}$$

For  $j = k - 1$ :

$$\text{Cov}(A_j, B_k) = \frac{\sigma_{j,j}^2}{J-j} - \frac{1}{(J-j)(J-j-1)} \sum_{\ell=j+1}^{J-1} \sigma_{\ell,j}^2.$$

For  $j < k - 1$  or  $j > k$ ,  $\text{Cov}(A_j, B_k) = 0$ .

Therefore:

$$\begin{aligned} \text{Cov}(\hat{\beta}^{NPWP}, \hat{\beta}^{CO}) &= \text{Cov} \left( \sum_{j=2}^{J-1} v_j A_j, \sum_{k=2}^{J-1} w_k B_k \right) = \sum_{j=2}^{J-1} \sum_{k=2}^{J-1} v_j w_k \text{Cov}(A_j, B_k) \\ &= \sum_{j=2}^{J-1} v_j w_j \left[ \frac{1}{j-1} \sigma_{j-1,j}^2 + \frac{1}{(J-j)^2} \sum_{i=j}^{J-1} \sigma_{i,j}^2 \right] + \sum_{j=2}^{J-2} v_j w_{j+1} \left[ \frac{\sigma_{j,j}^2}{J-j} - \frac{1}{(J-j)(J-j-1)} \sum_{i=j+1}^{J-1} \sigma_{i,j}^2 \right]. \quad (\text{B6}) \end{aligned}$$

Note that, like the variance of the crossover estimator, the covariance here does not depend on  $\tau^2$ .

## B.5 Conditions for the ensemble estimator to have lower variance

If we moreover assume that  $\sigma_{ij}^2 = \sigma^2$  for all  $i, j$ , then:

$$\begin{aligned} \text{Var}(\hat{\beta}^{NPWP}) &= (\tau^2 + \sigma^2) \sum_{j=2}^{J-1} v_j^2 \left[ \frac{J-1}{(J-j)(j-1)} \right] + 2\tau^2 \sum_{j=2}^{J-2} \sum_{k=j+1}^{J-1} v_j v_k \frac{J-1}{(J-j)(k-1)}, \\ &= (\tau^2 + \sigma^2) \sum_{j=2}^{J-1} v_j^2 \left( \frac{1}{j-1} + \frac{1}{J-j} \right) + 2\tau^2 \sum_{j=2}^{J-2} \sum_{k=j+1}^{J-1} v_j v_k \frac{J-1}{(J-j)(k-1)}. \end{aligned}$$

$$\text{Var}(\hat{\beta}^{CO}) = 2 \sum_{j=2}^{J-1} w_j^2 \sigma^2 \left( 1 + \frac{1}{J-j} \right).$$

$$\text{Cov}(\hat{\beta}^{NPWP}, \hat{\beta}^{CO}) = \sum_{j=2}^{J-1} v_j w_j \sigma^2 \left( \frac{1}{j-1} + \frac{1}{J-j} \right) < \sum_{j=2}^{J-1} v_j w_j \sigma^2 \left( 1 + \frac{1}{J-j} \right).$$

$$\text{Cov}(\hat{\beta}^{NPWP}, \hat{\beta}^{CO}) = \sum_{j=2}^{J-1} v_j w_j \sigma^2 \left( \frac{1}{j-1} + \frac{1}{J-j} \right) < \sigma^2 \sum_{j=2}^{J-1} v_j w_j \left( \frac{1}{j-1} + \frac{1}{J-j} \right) + 2\tau^2 \sum_{j=2}^{J-2} \sum_{k=j+1}^{J-1} v_j v_k \frac{J-1}{(J-j)(k-1)}.$$

If  $v_j \leq 2w_j$  for all  $j = 1, \dots, n$ , then  $\text{Cov}(\hat{\beta}^{NPWP}, \hat{\beta}^{CO}) < \text{Var}(\hat{\beta}^{CO})$ . If  $\sigma^2 w_j < (\tau^2 + \sigma^2) v_j$  for all  $j = 1, \dots, n$ , then  $\text{Cov}(\hat{\beta}^{NPWP}, \hat{\beta}^{CO}) < \text{Var}(\hat{\beta}^{NPWP})$ .

Now consider the ensemble estimator  $\hat{\beta}^{ENS} = \frac{1}{2} \hat{\beta}^{NPWP} + \frac{1}{2} \hat{\beta}^{CO}$ . Then:

$$\text{Var}(\hat{\beta}^{ENS}) = \frac{1}{4} \text{Var}(\hat{\beta}^{NPWP}) + \frac{1}{4} \text{Var}(\hat{\beta}^{CO}) + \frac{1}{2} \text{Cov}(\hat{\beta}^{NPWP}, \hat{\beta}^{CO}).$$

So a necessary and sufficient condition for  $\text{Var}(\hat{\beta}^{ENS}) < \min(\text{Var}(\hat{\beta}^{NPWP}), \text{Var}(\hat{\beta}^{CO}))$  is:

$$2 \text{Cov}(\hat{\beta}^{NPWP}, \hat{\beta}^{CO}) < 3 \min(\text{Var}(\hat{\beta}^{NPWP}), \text{Var}(\hat{\beta}^{CO})) - \max(\text{Var}(\hat{\beta}^{NPWP}), \text{Var}(\hat{\beta}^{CO})).$$

For  $\tau^2 = 0$ ,  $\text{Var}(\hat{\beta}^{NPWP} < \hat{\beta}^{CO})$  for some values of  $v_j, w_j$ , and  $\sigma^2$  (e.g., for  $v_j = w_j$  for all  $\sigma^2$ ). Take such a set of values of  $v_j, w_j$ , and  $\sigma^2$ . Then, since  $\text{Var}(\hat{\beta}^{NPWP})$  is an increasing function of  $\tau^2$  and  $\text{Var}(\hat{\beta}^{CO})$  is independent of  $\tau^2$ , there is a  $\tau^2$  such that  $\text{Var}(\hat{\beta}^{NPWP}) = \text{Var}(\hat{\beta}^{CO})$ . So the condition simplifies to:

$$2 \text{Cov}(\hat{\beta}^{NPWP}, \hat{\beta}^{CO}) < 2 \text{Var}(\hat{\beta}^{CO}).$$

For  $v_j \leq 2w_j$  for all  $j = 2, \dots, J-1$ ,  $\text{Cov}(\hat{\beta}^{NPWP}, \hat{\beta}^{CO}) < \text{Var}(\hat{\beta}^{CO})$ . Hence, in this setting, the ensemble estimator has a lower variance than either single estimator.

This suggests that when  $\tau^2$  is low enough that the crossover estimator and the non-parametric within-period estimator to have similar variances, and the  $v_j$  and  $w_j$  are close enough for the covariance to be lower than either of these variances, the ensemble method has lower variance than either single estimator.
