# Supplementary material
Source: PubMed Central journal article supplement (PMC7247054)
Supplement: NIHMS1584372-supplement-Appendix_C.pdf [file NIHMS1584372-supplement-Appendix_C.pdf]

## C TABLES OF SIMULATION RESULTS

**TABLE C1** Results for Figures 3–6. Mean and Standard Deviation of Effect Estimates, 95% Confidence Interval Coverage, and Type I Error/Power for 4 Risk Difference Scenarios across 1,000 Simulations

| Method                                         |       | $\beta = 0$ |           |          |       | $\beta = -0.10$ |           |          |       |
|------------------------------------------------|-------|-------------|-----------|----------|-------|-----------------|-----------|----------|-------|
|                                                |       | Mean        | Std. Dev. | Coverage | TIE   | Mean            | Std. Dev. | Coverage | Power |
| Scenario 1. Common Time Effects, $\nu = 0$     |       |             |           |          |       |                 |           |          |       |
| Mixed Effects Model-Based Methods              | MEM   | 0.000       | 0.022     | 0.946    | 0.054 | -0.100          | 0.023     | 0.940    | 0.985 |
|                                                | CPI   | 0.000       | 0.022     | 0.945    | 0.055 | -0.100          | 0.023     | 0.940    | 0.983 |
|                                                | MEM-a | 0.000       | 0.022     | 0.947    | 0.053 | -0.100          | 0.023     | 0.937    | 0.991 |
|                                                | CPI-a | 0.000       | 0.022     | 0.947    | 0.053 | -0.100          | 0.023     | 0.940    | 0.989 |
| Non-Parametric Within-Period                   | NPWP  | -0.001      | 0.049     | 0.959    | 0.041 | -0.100          | 0.051     | 0.937    | 0.572 |
| Synthetic Control                              | SC-1  | -0.001      | 0.041     | 0.952    | 0.048 | -0.100          | 0.042     | 0.937    | 0.644 |
|                                                | SC-2  | 0.000       | 0.038     | 0.935    | 0.065 | -0.100          | 0.037     | 0.939    | 0.747 |
| Crossover                                      | CO-1  | 0.000       | 0.033     | 0.952    | 0.048 | -0.101          | 0.033     | 0.948    | 0.829 |
|                                                | CO-2  | 0.000       | 0.032     | 0.958    | 0.042 | -0.101          | 0.032     | 0.953    | 0.844 |
|                                                | CO-3  | 0.001       | 0.030     | 0.951    | 0.049 | -0.100          | 0.029     | 0.949    | 0.911 |
| Crossover-Synthetic Control                    | COSC  | 0.000       | 0.034     | 0.947    | 0.053 | -0.101          | 0.034     | 0.941    | 0.788 |
| Ensemble                                       | ENS   | 0.000       | 0.029     | 0.951    | 0.049 | -0.101          | 0.029     | 0.947    | 0.920 |
| Scenario 2. Common Time Effects, $\nu = 0.01$  |       |             |           |          |       |                 |           |          |       |
| Mixed Effects Model-Based Methods              | MEM   | -0.000      | 0.024     | 0.944    | 0.056 | -0.099          | 0.023     | 0.946    | 0.988 |
|                                                | CPI   | -0.000      | 0.024     | 0.944    | 0.056 | -0.099          | 0.023     | 0.946    | 0.985 |
|                                                | MEM-a | -0.000      | 0.024     | 0.934    | 0.066 | -0.099          | 0.023     | 0.942    | 0.991 |
|                                                | CPI-a | -0.000      | 0.024     | 0.935    | 0.065 | -0.099          | 0.023     | 0.945    | 0.990 |
| Non-Parametric Within-Period                   | NPWP  | -0.003      | 0.049     | 0.953    | 0.047 | -0.100          | 0.050     | 0.942    | 0.564 |
| Synthetic Control                              | SC-1  | -0.001      | 0.041     | 0.949    | 0.051 | -0.100          | 0.042     | 0.942    | 0.649 |
|                                                | SC-2  | 0.000       | 0.036     | 0.945    | 0.055 | -0.100          | 0.037     | 0.949    | 0.742 |
| Crossover                                      | CO-1  | 0.001       | 0.034     | 0.945    | 0.055 | -0.101          | 0.034     | 0.943    | 0.805 |
|                                                | CO-2  | 0.000       | 0.034     | 0.942    | 0.058 | -0.101          | 0.033     | 0.951    | 0.828 |
|                                                | CO-3  | 0.000       | 0.031     | 0.945    | 0.055 | -0.101          | 0.031     | 0.948    | 0.886 |
| Crossover-Synthetic Control                    | COSC  | 0.001       | 0.035     | 0.945    | 0.055 | -0.101          | 0.035     | 0.962    | 0.784 |
| Ensemble                                       | ENS   | 0.000       | 0.029     | 0.944    | 0.056 | -0.100          | 0.029     | 0.947    | 0.918 |
| Scenario 3. Varying Time Effects, $\nu = 0$    |       |             |           |          |       |                 |           |          |       |
| Mixed Effects Model-Based Methods              | MEM   | 0.000       | 0.050     | 0.943    | 0.057 | -0.101          | 0.051     | 0.942    | 0.510 |
|                                                | CPI   | 0.000       | 0.051     | 0.941    | 0.059 | -0.101          | 0.052     | 0.944    | 0.503 |
|                                                | MEM-a | 0.000       | 0.050     | 0.626    | 0.374 | -0.101          | 0.051     | 0.580    | 0.871 |
|                                                | CPI-a | 0.000       | 0.051     | 0.753    | 0.247 | -0.101          | 0.052     | 0.765    | 0.756 |
| Non-Parametric Within-Period                   | NPWP  | -0.002      | 0.064     | 0.944    | 0.056 | -0.102          | 0.065     | 0.943    | 0.380 |
| Synthetic Control                              | SC-1  | -0.001      | 0.050     | 0.942    | 0.058 | -0.100          | 0.050     | 0.947    | 0.471 |
|                                                | SC-2  | 0.000       | 0.046     | 0.942    | 0.058 | -0.098          | 0.045     | 0.952    | 0.526 |
| Crossover                                      | CO-1  | 0.000       | 0.040     | 0.961    | 0.039 | -0.102          | 0.041     | 0.939    | 0.681 |
|                                                | CO-2  | -0.000      | 0.037     | 0.963    | 0.037 | -0.102          | 0.038     | 0.940    | 0.727 |
|                                                | CO-3  | 0.000       | 0.035     | 0.957    | 0.043 | -0.102          | 0.036     | 0.948    | 0.791 |
| Crossover-Synthetic Control                    | COSC  | 0.000       | 0.042     | 0.956    | 0.044 | -0.103          | 0.042     | 0.947    | 0.644 |
| Ensemble                                       | ENS   | 0.000       | 0.036     | 0.957    | 0.043 | -0.100          | 0.036     | 0.950    | 0.765 |
| Scenario 4. Varying Time Effects, $\nu = 0.01$ |       |             |           |          |       |                 |           |          |       |
| Mixed Effects Model-Based Methods              | MEM   | 0.001       | 0.051     | 0.940    | 0.060 | -0.099          | 0.050     | 0.952    | 0.482 |
|                                                | CPI   | 0.001       | 0.051     | 0.935    | 0.065 | -0.100          | 0.051     | 0.948    | 0.477 |
|                                                | MEM-a | 0.001       | 0.051     | 0.622    | 0.378 | -0.099          | 0.050     | 0.604    | 0.866 |
|                                                | CPI-a | 0.001       | 0.051     | 0.778    | 0.222 | -0.100          | 0.051     | 0.784    | 0.747 |
| Non-Parametric Within-Period                   | NPWP  | -0.000      | 0.064     | 0.937    | 0.063 | -0.102          | 0.064     | 0.943    | 0.353 |
| Synthetic Control                              | SC-1  | 0.000       | 0.048     | 0.947    | 0.053 | -0.102          | 0.050     | 0.946    | 0.473 |
|                                                | SC-2  | 0.001       | 0.044     | 0.949    | 0.051 | -0.101          | 0.045     | 0.949    | 0.557 |
| Crossover                                      | CO-1  | -0.001      | 0.042     | 0.940    | 0.060 | -0.100          | 0.042     | 0.950    | 0.642 |
|                                                | CO-2  | -0.001      | 0.039     | 0.944    | 0.056 | -0.100          | 0.039     | 0.951    | 0.706 |
|                                                | CO-3  | 0.000       | 0.036     | 0.953    | 0.047 | -0.100          | 0.036     | 0.953    | 0.776 |
| Crossover-Synthetic Control                    | COSC  | -0.001      | 0.043     | 0.951    | 0.049 | -0.100          | 0.043     | 0.958    | 0.607 |
| Ensemble                                       | ENS   | 0.000       | 0.037     | 0.948    | 0.052 | -0.101          | 0.036     | 0.953    | 0.759 |

**TABLE C2** Results for Figures 8–11. Mean and Standard Deviation of Effect Estimates, 95% Confidence Interval Coverage, and Type I Error/Power for 4 Odds Ratio Scenarios across 1,000 Simulations

| Method                                         |       | $\beta = 0$ |           |          |       | $\beta = -0.10$ |           |          |       |
|------------------------------------------------|-------|-------------|-----------|----------|-------|-----------------|-----------|----------|-------|
|                                                |       | Mean        | Std. Dev. | Coverage | TIE   | Mean            | Std. Dev. | Coverage | Power |
| Scenario 1. Common Time Effects, $\nu = 0$     |       |             |           |          |       |                 |           |          |       |
| Mixed Effects Model-Based Methods              | MEM   | 0.001       | 0.089     | 0.939    | 0.061 | -0.418          | 0.088     | 0.946    | 0.993 |
|                                                | CPI   | 0.001       | 0.090     | 0.938    | 0.062 | -0.418          | 0.088     | 0.947    | 0.993 |
|                                                | MEM-a | 0.001       | 0.089     | 0.924    | 0.076 | -0.418          | 0.088     | 0.931    | 0.996 |
|                                                | CPI-a | 0.001       | 0.090     | 0.926    | 0.074 | -0.418          | 0.088     | 0.935    | 0.995 |
| Non-Parametric Within-Period                   | NPWP  | -0.001      | 0.114     | 0.934    | 0.066 | -0.418          | 0.110     | 0.947    | 0.943 |
| Synthetic Control                              | SC-1  | -0.001      | 0.111     | 0.947    | 0.053 | -0.418          | 0.111     | 0.949    | 0.940 |
|                                                | SC-2  | -0.003      | 0.114     | 0.949    | 0.051 | -0.420          | 0.113     | 0.947    | 0.932 |
| Crossover                                      | CO-1  | 0.002       | 0.145     | 0.957    | 0.043 | -0.430          | 0.141     | 0.948    | 0.832 |
|                                                | CO-2  | 0.003       | 0.142     | 0.957    | 0.043 | -0.430          | 0.138     | 0.953    | 0.831 |
|                                                | CO-3  | 0.002       | 0.129     | 0.962    | 0.038 | -0.429          | 0.124     | 0.954    | 0.908 |
| Crossover-Synthetic Control                    | COSC  | -0.000      | 0.146     | 0.951    | 0.049 | -0.425          | 0.146     | 0.951    | 0.781 |
| Ensemble                                       | ENS   | 0.000       | 0.110     | 0.946    | 0.054 | -0.425          | 0.107     | 0.947    | 0.962 |
| Scenario 2. Common Time Effects, $\nu = 0.01$  |       |             |           |          |       |                 |           |          |       |
| Mixed Effects Model-Based Methods              | MEM   | -0.002      | 0.090     | 0.943    | 0.057 | -0.417          | 0.091     | 0.935    | 0.995 |
|                                                | CPI   | -0.002      | 0.090     | 0.943    | 0.057 | -0.417          | 0.091     | 0.938    | 0.994 |
|                                                | MEM-a | -0.002      | 0.090     | 0.924    | 0.076 | -0.417          | 0.091     | 0.919    | 0.998 |
|                                                | CPI-a | -0.002      | 0.090     | 0.927    | 0.073 | -0.417          | 0.091     | 0.921    | 0.998 |
| Non-Parametric Within-Period                   | NPWP  | -0.000      | 0.114     | 0.948    | 0.052 | -0.418          | 0.113     | 0.930    | 0.940 |
| Synthetic Control                              | SC-1  | -0.000      | 0.114     | 0.951    | 0.049 | -0.417          | 0.112     | 0.952    | 0.932 |
|                                                | SC-2  | -0.000      | 0.114     | 0.955    | 0.045 | -0.417          | 0.114     | 0.937    | 0.915 |
| Crossover                                      | CO-1  | 0.002       | 0.137     | 0.954    | 0.046 | -0.421          | 0.145     | 0.947    | 0.813 |
|                                                | CO-2  | 0.001       | 0.136     | 0.951    | 0.049 | -0.422          | 0.144     | 0.946    | 0.830 |
|                                                | CO-3  | 0.000       | 0.123     | 0.961    | 0.039 | -0.421          | 0.133     | 0.940    | 0.888 |
| Crossover-Synthetic Control                    | COSC  | 0.002       | 0.145     | 0.948    | 0.052 | -0.420          | 0.151     | 0.948    | 0.777 |
| Ensemble                                       | ENS   | 0.001       | 0.107     | 0.955    | 0.045 | -0.420          | 0.110     | 0.948    | 0.950 |
| Scenario 3. Varying Time Effects, $\nu = 0$    |       |             |           |          |       |                 |           |          |       |
| Mixed Effects Model-Based Methods              | MEM   | 0.003       | 0.190     | 0.945    | 0.055 | -0.407          | 0.196     | 0.966    | 0.485 |
|                                                | CPI   | 0.003       | 0.190     | 0.950    | 0.050 | -0.412          | 0.197     | 0.964    | 0.478 |
|                                                | MEM-a | 0.003       | 0.190     | 0.639    | 0.361 | -0.407          | 0.196     | 0.604    | 0.885 |
|                                                | CPI-a | 0.003       | 0.190     | 0.771    | 0.229 | -0.412          | 0.197     | 0.758    | 0.801 |
| Non-Parametric Within-Period                   | NPWP  | -0.001      | 0.192     | 0.949    | 0.051 | -0.416          | 0.193     | 0.955    | 0.515 |
| Synthetic Control                              | SC-1  | 0.000       | 0.161     | 0.948    | 0.052 | -0.425          | 0.160     | 0.960    | 0.663 |
|                                                | SC-2  | 0.002       | 0.155     | 0.946    | 0.054 | -0.424          | 0.152     | 0.951    | 0.691 |
| Crossover                                      | CO-1  | 0.006       | 0.170     | 0.954    | 0.046 | -0.430          | 0.173     | 0.950    | 0.663 |
|                                                | CO-2  | 0.006       | 0.160     | 0.958    | 0.042 | -0.428          | 0.164     | 0.951    | 0.706 |
|                                                | CO-3  | 0.004       | 0.144     | 0.952    | 0.048 | -0.425          | 0.151     | 0.949    | 0.772 |
| Crossover-Synthetic Control                    | COSC  | 0.007       | 0.174     | 0.959    | 0.041 | -0.429          | 0.184     | 0.945    | 0.611 |
| Ensemble                                       | ENS   | 0.004       | 0.139     | 0.949    | 0.051 | -0.426          | 0.141     | 0.950    | 0.815 |
| Scenario 4. Varying Time Effects, $\nu = 0.01$ |       |             |           |          |       |                 |           |          |       |
| Mixed Effects Model-Based Methods              | MEM   | 0.011       | 0.204     | 0.944    | 0.056 | -0.408          | 0.208     | 0.947    | 0.481 |
|                                                | CPI   | 0.010       | 0.206     | 0.947    | 0.053 | -0.414          | 0.207     | 0.951    | 0.499 |
|                                                | MEM-a | 0.011       | 0.204     | 0.581    | 0.419 | -0.408          | 0.208     | 0.587    | 0.869 |
|                                                | CPI-a | 0.010       | 0.206     | 0.738    | 0.262 | -0.414          | 0.207     | 0.721    | 0.795 |
| Non-Parametric Within-Period                   | NPWP  | 0.001       | 0.202     | 0.942    | 0.058 | -0.418          | 0.204     | 0.959    | 0.517 |
| Synthetic Control                              | SC-1  | -0.003      | 0.170     | 0.949    | 0.051 | -0.424          | 0.167     | 0.947    | 0.645 |
|                                                | SC-2  | -0.004      | 0.163     | 0.941    | 0.059 | -0.422          | 0.158     | 0.947    | 0.692 |
| Crossover                                      | CO-1  | -0.006      | 0.171     | 0.950    | 0.050 | -0.423          | 0.179     | 0.951    | 0.652 |
|                                                | CO-2  | -0.006      | 0.163     | 0.947    | 0.053 | -0.422          | 0.170     | 0.949    | 0.700 |
|                                                | CO-3  | -0.005      | 0.151     | 0.950    | 0.050 | -0.420          | 0.157     | 0.951    | 0.747 |
| Crossover-Synthetic Control                    | COSC  | -0.007      | 0.180     | 0.948    | 0.052 | -0.424          | 0.188     | 0.947    | 0.620 |
| Ensemble                                       | ENS   | -0.005      | 0.144     | 0.948    | 0.052 | -0.422          | 0.145     | 0.956    | 0.817 |
